# Supplementary material
Source: PubMed Central journal article supplement (PMC8343383)
Supplement: mmc1.pdf [file mmc1.pdf]

## Healthy Controls

| Participant | Age | Male/Female | BMI   | SBP | DBP | FBS | TG  |
|-------------|-----|-------------|-------|-----|-----|-----|-----|
| 1           | 34  | M           | 24.62 | 100 | 63  | 101 | 98  |
| 2           | 42  | F           | 25.32 | 106 | 64  | 97  | 128 |
| 3           | 50  | M           | 26.54 | 116 | 72  | 153 | 129 |
| 4           | 28  | M           | 21.8  | 95  | 65  | 60  | 83  |
| 5           | 41  | M           | 27.46 | 114 | 72  | 102 | 158 |
| 6           | 63  | F           | 27.05 | 118 | 72  | 106 | 155 |
| 7           | 61  | M           | 25.1  | 112 | 75  | 96  | 125 |
| 8           | 30  | F           | 26.34 | 107 | 71  | 115 | 132 |
| 9           | 40  | M           | 25    | 111 | 71  | 94  | 123 |
| 10          | 83  | M           | 27.91 | 129 | 86  | 105 | 164 |
| 11          | 67  | M           | 28.46 | 132 | 89  | 110 | 168 |
| 12          | 43  | F           | 32.55 | 125 | 81  | 163 | 208 |
| 13          | 45  | M           | 26.6  | 110 | 68  | 103 | 135 |
| 14          | 73  | F           | 24.31 | 122 | 80  | 108 | 101 |
| 15          | 64  | M           | 23.34 | 115 | 81  | 86  | 90  |
| 16          | 31  | F           | 34.52 | 128 | 82  | 131 | 246 |
| 17          | 60  | M           | 28.91 | 124 | 85  | 96  | 174 |
| 18          | 72  | F           | 22.05 | 96  | 56  | 91  | 86  |
| 19          | 45  | M           | 33.4  | 135 | 90  | 156 | 188 |
| 20          | 64  | F           | 20.5  | 98  | 60  | 87  | 77  |
| 21          | 51  | F           | 28.15 | 126 | 76  | 110 | 178 |
| 22          | 75  | M           | 25.98 | 129 | 84  | 113 | 118 |
| 23          | 32  | F           | 19.8  | 89  | 59  | 72  | 65  |
| 24          | 69  | F           | 24.45 | 102 | 68  | 91  | 103 |
| 25          | 51  | M           | 27.2  | 117 | 70  | 94  | 151 |
| 26          | 62  | F           | 26.38 | 118 | 70  | 158 | 136 |
| 27          | 49  | F           | 23    | 97  | 63  | 89  | 81  |
| 28          | 72  | F           | 26.89 | 120 | 73  | 100 | 121 |
| 29          | 31  | M           | 25.12 | 108 | 73  | 77  | 119 |
| 30          | 33  | M           | 27.82 | 122 | 72  | 101 | 139 |
| 31          | 52  | F           | 28.02 | 113 | 68  | 146 | 182 |
| 32          | 50  | M           | 25.53 | 109 | 66  | 84  | 119 |
| 33          | 47  | F           | 21.2  | 93  | 62  | 90  | 79  |
| 34          | 50  | M           | 23.82 | 112 | 70  | 82  | 91  |
| 35          | 58  | F           | 30.2  | 130 | 87  | 85  | 278 |
| 36          | 35  | M           | 31.16 | 126 | 88  | 103 | 256 |
| 37          | 78  | F           | 24.14 | 110 | 71  | 91  | 111 |
| 38          | 55  | M           | 26.68 | 105 | 69  | 104 | 140 |
| 39          | 66  | F           | 28.75 | 118 | 76  | 152 | 148 |
| 40          | 36  | F           | 22.16 | 98  | 65  | 95  | 88  |
| 41          | 39  | M           | 31.36 | 125 | 83  | 105 | 263 |
| 42          | 77  | F           | 24.8  | 105 | 68  | 96  | 105 |
| 43          | 61  | M           | 24.68 | 104 | 65  | 107 | 114 |
| 44          | 48  | M           | 28.34 | 119 | 79  | 150 | 197 |
| 45          | 71  | F           | 26.12 | 110 | 71  | 102 | 144 |
| 46          | 54  | F           | 24.12 | 99  | 61  | 108 | 108 |
| 47          | 38  | F           | 22.1  | 95  | 61  | 88  | 85  |
| 48          | 46  | M           | 29.9  | 121 | 77  | 100 | 294 |
| 49          | 81  | F           | 24.35 | 102 | 66  | 92  | 93  |
| 50          | 37  | F           | 30.64 | 124 | 75  | 99  | 228 |

| Cholesterol | HDL  | LDL | Albumin | Creatinine | GFR   | Diabet   | COVID Test |
|-------------|------|-----|---------|------------|-------|----------|------------|
| 147         | 52   | 83  | 3.41    | 0.99       | 68    | Negative | Negative   |
| 177         | 47   | 88  | 3.23    | 0.6        | 55    | Negative | Negative   |
| 186         | 44   | 94  | 3.62    | 2.38       | 94    | Positive | Negative   |
| 112         | 54   | 95  | 3.9     | 3.79       | 132   | Negative | Negative   |
| 213         | 33.5 | 106 | 3.23    | 0.56       | 54    | Negative | Negative   |
| 210         | 41.5 | 105 | 3.37    | 0.78       | 63    | Negative | Negative   |
| 183         | 51   | 97  | 3.18    | 0.51       | 50    | Negative | Negative   |
| 189         | 42   | 99  | 3.2     | 0.35       | 48    | Negative | Negative   |
| 182         | 47   | 92  | 3.4     | 0.94       | 66    | Negative | Negative   |
| 207         | 33   | 107 | 3.19    | 0.46       | 49.5  | Negative | Negative   |
| 215         | 29   | 108 | 3.3     | 0.71       | 58    | Negative | Negative   |
| 232         | 31.5 | 148 | 3.88    | 3.52       | 126   | Positive | Negative   |
| 191         | 40   | 100 | 3.15    | 0.25       | 41    | Negative | Negative   |
| 151         | 62   | 134 | 3.37    | 1.18       | 73    | Negative | Negative   |
| 144         | 56   | 129 | 3.38    | 1.23       | 75    | Negative | Negative   |
| 245         | 42   | 171 | 3.27    | 0.69       | 57    | Negative | Negative   |
| 157         | 28   | 103 | 3.46    | 1.34       | 78.5  | Negative | Negative   |
| 117         | 41   | 77  | 3.34    | 0.73       | 61.5  | Negative | Negative   |
| 226         | 53   | 197 | 3.14    | 0.22       | 39.5  | Positive | Negative   |
| 88          | 33   | 66  | 3.39    | 0.88       | 65    | Negative | Negative   |
| 222         | 54   | 202 | 3.45    | 1.29       | 85    | Negative | Negative   |
| 171         | 49.5 | 109 | 3.86    | 3.51       | 120   | Negative | Negative   |
| 103         | 26.5 | 71  | 3.51    | 1.81       | 77    | Negative | Negative   |
| 160         | 50.5 | 112 | 3.45    | 1.49       | 80    | Negative | Negative   |
| 203         | 39   | 157 | 3.44    | 0.82       | 63    | Negative | Negative   |
| 195         | 41   | 114 | 3.44    | 0.84       | 64    | Positive | Negative   |
| 124         | 52   | 160 | 3.52    | 2.53       | 100   | Negative | Negative   |
| 180         | 39.5 | 127 | 3.84    | 3.42       | 115   | Negative | Negative   |
| 175         | 62   | 120 | 3.26    | 0.64       | 56.5  | Negative | Negative   |
| 175         | 36   | 144 | 3.08    | 0.18       | 38    | Negative | Negative   |
| 218         | 48.5 | 178 | 3.58    | 2.63       | 100.5 | Positive | Negative   |
| 172         | 50.5 | 151 | 3.82    | 3.18       | 113   | Negative | Negative   |
| 108         | 38.5 | 90  | 3.43    | 1.09       | 72    | Negative | Negative   |
| 140         | 43.5 | 133 | 3.64    | 1.88       | 86.5  | Negative | Negative   |
| 234         | 42   | 141 | 3.54    | 2.08       | 91    | Negative | Negative   |
| 240         | 37   | 136 | 3.55    | 2.21       | 92    | Negative | Negative   |
| 172         | 43   | 71  | 3.46    | 1.4        | 82    | Negative | Negative   |
| 197         | 57   | 165 | 3.48    | 1.66       | 79    | Negative | Negative   |
| 202         | 35   | 139 | 3.81    | 3.16       | 110   | Positive | Negative   |
| 128         | 37   | 81  | 3.59    | 2.45       | 97    | Negative | Negative   |
| 247         | 42   | 155 | 3.53    | 1.96       | 88    | Negative | Negative   |
| 163         | 50   | 117 | 3.21    | 0.55       | 53    | Negative | Negative   |
| 174         | 59   | 115 | 3.7     | 2.82       | 103   | Negative | Negative   |
| 229         | 38   | 118 | 3.72    | 2.92       | 108   | Positive | Negative   |
| 199         | 45   | 126 | 3.42    | 1          | 71    | Negative | Negative   |
| 167         | 49   | 101 | 3.56    | 2.31       | 93    | Negative | Negative   |
| 130         | 55   | 123 | 3.49    | 1.77       | 84    | Negative | Negative   |
| 258         | 35   | 125 | 3.77    | 3          | 109   | Negative | Negative   |
| 133         | 50   | 110 | 3.15    | 0.25       | 44    | Negative | Negative   |
| 251         | 36.5 | 138 | 3.32    | 0.73       | 60    | Negative | Negative   |

| Lymphocyte | CD4+ T Cells | CD8+ T Cells | PD-1+ CD4+ T Cells (%) |
|------------|--------------|--------------|------------------------|
| 1440       | 860          | 420          | 15.3                   |
| 1720       | 1000         | 580          | 21.5                   |
| 3200       | 1900         | 960          | 34                     |
| 2100       | 1200         | 740          | 26                     |
| 1550       | 920          | 500          | 18                     |
| 1480       | 890          | 440          | 16                     |
| 1000       | 690          | 310          | 12.2                   |
| 1200       | 660          | 340          | 12                     |
| 1530       | 910          | 480          | 17.3                   |
| 1700       | 990          | 600          | 22.5                   |
| 2900       | 1600         | 870          | 31                     |
| 2600       | 1500         | 830          | 40                     |
| 1540       | 915          | 490          | 17.5                   |
| 1780       | 1020         | 620          | 23                     |
| 1150       | 600          | 330          | 11.5                   |
| 2500       | 1450         | 800          | 29                     |
| 1860       | 1100         | 640          | 24                     |
| 1570       | 935          | 520          | 18.5                   |
| 2400       | 1400         | 760          | 27                     |
| 1260       | 750          | 370          | 13.5                   |
| 1740       | 1005         | 590          | 21                     |
| 1580       | 940          | 530          | 19                     |
| 750        | 450          | 225          | 9                      |
| 1640       | 970          | 560          | 20.2                   |
| 1660       | 980          | 570          | 20.5                   |
| 2340       | 1330         | 700          | 25.5                   |
| 880        | 530          | 270          | 10.3                   |
| 1240       | 720          | 360          | 13.3                   |
| 1520       | 905          | 470          | 17                     |
| 800        | 480          | 240          | 5                      |
| 1950       | 1150         | 660          | 24.5                   |
| 1510       | 900          | 460          | 16.5                   |
| 980        | 580          | 300          | 11.3                   |
| 1320       | 750          | 380          | 14                     |
| 1680       | 1010         | 610          | 22                     |
| 1620       | 960          | 550          | 20                     |
| 1460       | 870          | 430          | 15.5                   |
| 1260       | 790          | 390          | 14.2                   |
| 1560       | 930          | 510          | 18.2                   |
| 1400       | 840          | 400          | 14.5                   |
| 1590       | 950          | 540          | 19.3                   |
| 950        | 570          | 290          | 11                     |
| 920        | 550          | 280          | 10.5                   |
| 1500       | 900          | 450          | 16.2                   |
| 1100       | 700          | 320          | 12.5                   |
| 1220       | 710          | 350          | 13                     |
| 840        | 500          | 260          | 10                     |
| 1800       | 1050         | 630          | 23.5                   |
| 2300       | 1300         | 680          | 25                     |
| 1360       | 810          | 410          | 15                     |

| PD-1+ CD8+ T Cells (%) | IL-2R | IL-1B | TNFa |
|------------------------|-------|-------|------|
| 22.5                   | 440   | 60    | 34   |
| 35                     | 610   | 120   | 44   |
| 53                     | 800   | 155   | 68   |
| 39                     | 715   | 139   | 50   |
| 28                     | 500   | 80    | 37   |
| 23.5                   | 460   | 65    | 35   |
| 18                     | 350   | 30    | 24.2 |
| 19.5                   | 340   | 40    | 24.1 |
| 27                     | 485   | 70    | 36   |
| 36                     | 600   | 110   | 43   |
| 48                     | 780   | 172   | 95   |
| 62                     | 870   | 160   | 82   |
| 28                     | 490   | 80    | 37   |
| 37                     | 620   | 120   | 46   |
| 19                     | 330   | 35    | 24   |
| 42                     | 750   | 150   | 56   |
| 37                     | 640   | 135   | 48   |
| 32                     | 540   | 95    | 39   |
| 40                     | 730   | 142   | 52.5 |
| 20.5                   | 390   | 45    | 29   |
| 34                     | 590   | 115   | 45   |
| 29                     | 510   | 80    | 37   |
| 10                     | 230   | 10    | 5    |
| 33                     | 560   | 100   | 41   |
| 34                     | 570   | 105   | 42   |
| 38                     | 680   | 135   | 49   |
| 14                     | 280   | 20    | 15   |
| 20                     | 380   | 43    | 28   |
| 26.6                   | 470   | 67    | 36   |
| 6                      | 180   | 5     | 10   |
| 39                     | 700   | 140   | 52   |
| 25.5                   | 475   | 70    | 36   |
| 16                     | 320   | 28    | 22   |
| 20.5                   | 430   | 58    | 32   |
| 35                     | 580   | 108   | 44   |
| 33                     | 550   | 98    | 40   |
| 23                     | 445   | 60    | 35   |
| 21                     | 420   | 55    | 33   |
| 31                     | 530   | 90    | 39   |
| 21.5                   | 410   | 50    | 30   |
| 30                     | 520   | 80    | 38   |
| 16                     | 310   | 25    | 19   |
| 15                     | 300   | 23    | 17   |
| 24.5                   | 465   | 65    | 35   |
| 18.5                   | 360   | 33    | 24.3 |
| 19.5                   | 370   | 42    | 26   |
| 12                     | 260   | 15    | 13   |
| 37                     | 630   | 130   | 47   |
| 38                     | 660   | 140   | 52.3 |
| 22                     | 400   | 49    | 33   |

Patients with mild symptoms

| Participant | Age | Male/Female | BMI   | SBP | DBP | FBS |
|-------------|-----|-------------|-------|-----|-----|-----|
| 1           | 51  | F           | 25.12 | 106 | 69  | 154 |
| 2           | 61  | F           | 33.36 | 132 | 88  | 130 |
| 3           | 44  | M           | 31.97 | 122 | 73  | 128 |
| 4           | 62  | M           | 25.43 | 111 | 69  | 80  |
| 5           | 54  | M           | 27.7  | 120 | 80  | 176 |
| 6           | 70  | F           | 26.63 | 134 | 90  | 136 |
| 7           | 67  | M           | 24    | 115 | 73  | 134 |
| 8           | 25  | F           | 36.71 | 137 | 92  | 126 |
| 9           | 35  | M           | 35.33 | 131 | 85  | 118 |
| 10          | 50  | F           | 22.61 | 102 | 64  | 72  |
| 11          | 47  | F           | 27.41 | 114 | 73  | 187 |
| 12          | 54  | M           | 32.15 | 128 | 73  | 124 |
| 13          | 37  | F           | 29.15 | 127 | 83  | 158 |
| 14          | 33  | M           | 35.83 | 131 | 85  | 117 |
| 15          | 58  | F           | 30    | 120 | 75  | 83  |
| 16          | 78  | F           | 28.28 | 118 | 73  | 149 |
| 17          | 29  | M           | 36.17 | 130 | 85  | 114 |
| 18          | 43  | F           | 22.34 | 101 | 65  | 105 |
| 19          | 40  | M           | 22.9  | 98  | 64  | 77  |
| 20          | 70  | M           | 28.72 | 123 | 80  | 102 |
| 21          | 79  | F           | 25.81 | 113 | 69  | 168 |
| 22          | 53  | M           | 22.86 | 109 | 68  | 81  |
| 23          | 31  | F           | 18.93 | 87  | 55  | 75  |
| 24          | 29  | M           | 19.92 | 104 | 64  | 68  |
| 25          | 45  | F           | 33.86 | 127 | 85  | 111 |
| 26          | 59  | M           | 29.56 | 121 | 79  | 155 |
| 27          | 72  | M           | 24.63 | 108 | 68  | 95  |
| 28          | 66  | F           | 32.13 | 126 | 83  | 99  |
| 29          | 69  | M           | 30.7  | 126 | 71  | 108 |
| 30          | 74  | F           | 24.15 | 107 | 65  | 145 |
| 31          | 30  | F           | 18.93 | 95  | 59  | 96  |
| 32          | 39  | M           | 35.27 | 128 | 78  | 162 |
| 33          | 59  | F           | 22.01 | 112 | 70  | 86  |
| 34          | 44  | M           | 20.62 | 100 | 64  | 95  |
| 35          | 62  | F           | 24.26 | 112 | 72  | 137 |
| 36          | 57  | F           | 30.61 | 119 | 74  | 148 |
| 37          | 76  | M           | 25.16 | 117 | 73  | 139 |
| 38          | 28  | F           | 34.21 | 116 | 73  | 165 |
| 39          | 37  | F           | 22.97 | 100 | 65  | 87  |
| 40          | 49  | M           | 32.15 | 120 | 76  | 108 |
| 41          | 64  | F           | 25    | 112 | 69  | 142 |
| 42          | 48  | M           | 22    | 102 | 62  | 84  |
| 43          | 34  | M           | 34.72 | 122 | 76  | 108 |
| 44          | 32  | F           | 19.49 | 104 | 63  | 87  |
| 45          | 71  | F           | 21.3  | 99  | 65  | 91  |
| 46          | 48  | M           | 31.46 | 124 | 79  | 161 |
| 47          | 42  | F           | 22.19 | 97  | 62  | 85  |
| 48          | 60  | M           | 25.95 | 116 | 73  | 148 |
| 49          | 36  | F           | 20.93 | 97  | 61  | 103 |
| 50          | 54  | F           | 21.49 | 107 | 66  | 106 |

| TG  | Cholesterol | HDL  | LDL | Albumin | Creatinine | GFR   | Diabet   |
|-----|-------------|------|-----|---------|------------|-------|----------|
| 132 | 177         | 47   | 131 | 3.6     | 2.1        | 83    | Psitive  |
| 319 | 270         | 36.5 | 145 | 2.76    | 0.4        | 38.5  | Negative |
| 248 | 283         | 32   | 115 | 3.2     | 0.9        | 57.5  | Negative |
| 134 | 182         | 43.5 | 131 | 4       | 3.36       | 125   | Negative |
| 152 | 192         | 41   | 134 | 3.55    | 1.88       | 77    | Psitive  |
| 149 | 191         | 43   | 133 | 3.16    | 0.88       | 56    | Negative |
| 131 | 183         | 43.5 | 130 | 3.23    | 0.96       | 58    | Negative |
| 266 | 267         | 39.5 | 165 | 2.7     | 0.46       | 39.5  | Negative |
| 234 | 254         | 45.5 | 182 | 3.29    | 1.14       | 62    | Negative |
| 121 | 176         | 54   | 125 | 3.29    | 1.2        | 63    | Negative |
| 159 | 193         | 40   | 135 | 4.1     | 3.53       | 123   | Psitive  |
| 283 | 245         | 28   | 119 | 3.12    | 0.85       | 54.5  | Negative |
| 169 | 198         | 38   | 137 | 3.28    | 1.09       | 60    | Psitive  |
| 276 | 238         | 49   | 204 | 3.56    | 1.99       | 79    | Negative |
| 201 | 214         | 30   | 121 | 2.8     | 0.49       | 41    | Negative |
| 163 | 195         | 39   | 130 | 3.41    | 1.51       | 69    | Negative |
| 298 | 232         | 51   | 219 | 3.7     | 2.24       | 87.5  | Negative |
| 118 | 159         | 62   | 129 | 3.45    | 1.6        | 72    | Negative |
| 113 | 162         | 55   | 110 | 3.55    | 1.94       | 78    | Negative |
| 162 | 194         | 42   | 136 | 3.97    | 3.2        | 138   | Negative |
| 139 | 186         | 42   | 132 | 3.04    | 0.64       | 44.5  | Psitive  |
| 111 | 165         | 59.5 | 129 | 3.51    | 1.79       | 75.5  | Negative |
| 78  | 122         | 47   | 86  | 2.62    | 0.23       | 28    | Negative |
| 86  | 115         | 55   | 90  | 2.92    | 0.73       | 46    | Negative |
| 258 | 227         | 34   | 141 | 3.92    | 2.91       | 110.5 | Negative |
| 174 | 198         | 38.5 | 133 | 3.53    | 1.82       | 76    | Psitive  |
| 128 | 173         | 48.5 | 128 | 2.84    | 0.32       | 36    | Negative |
| 228 | 223         | 36.5 | 152 | 3.41    | 1.41       | 68    | Negative |
| 208 | 203         | 34.5 | 136 | 3.96    | 3.08       | 114.5 | Negative |
| 125 | 172         | 49   | 126 | 2.97    | 0.8        | 52    | Negative |
| 71  | 103         | 27   | 80  | 3.36    | 1.32       | 66.5  | Negative |
| 217 | 209         | 35   | 148 | 3.82    | 2.39       | 95    | Psitive  |
| 110 | 168         | 58   | 95  | 3.08    | 0.83       | 54    | Negative |
| 99  | 127         | 53   | 105 | 3.43    | 1.56       | 70    | Negative |
| 123 | 170         | 50   | 125 | 3.63    | 2.17       | 84    | Negative |
| 194 | 212         | 42   | 139 | 2.77    | 0.54       | 42    | Negative |
| 139 | 188         | 41.5 | 133 | 3.4     | 1.37       | 67    | Negative |
| 215 | 220         | 35.5 | 143 | 3.44    | 1.57       | 75    | Psitive  |
| 108 | 155         | 56.5 | 100 | 3.88    | 2.69       | 118   | Negative |
| 184 | 205         | 37   | 139 | 3.85    | 2.48       | 106   | Negative |
| 141 | 190         | 41   | 132 | 2.99    | 0.77       | 49.5  | Negative |
| 106 | 152         | 54   | 133 | 3.5     | 1.73       | 73    | Negative |
| 193 | 218         | 33   | 138 | 3.26    | 1.02       | 59    | Negative |
| 95  | 133         | 51.5 | 114 | 3.65    | 2.03       | 81.5  | Negative |
| 101 | 147         | 50   | 133 | 2.95    | 0.68       | 46    | Negative |
| 177 | 202         | 37.5 | 137 | 3.46    | 1.63       | 71    | Psitive  |
| 105 | 144         | 50.5 | 123 | 3.3     | 1.26       | 64    | Negative |
| 148 | 189         | 42   | 136 | 3.47    | 1.69       | 74    | Negative |
| 97  | 137         | 51   | 125 | 2.89    | 0.6        | 43    | Negative |
| 103 | 140         | 50   | 131 | 3.77    | 2.3        | 91    | Negative |

| COVID Test | Lymphocyte | CD4+ T Cells | CD8+ T Cells | PD-1+ CD4+ T Cells (%) |
|------------|------------|--------------|--------------|------------------------|
| Psitive    | 1650       | 800          | 400          | 26                     |
| Psitive    | 965        | 410          | 255          | 36.5                   |
| Psitive    | 500        | 210          | 160          | 40                     |
| Psitive    | 1015       | 455          | 290          | 29.5                   |
| Psitive    | 1200       | 590          | 345          | 37.5                   |
| Psitive    | 955        | 400          | 245          | 27                     |
| Psitive    | 960        | 405          | 250          | 15                     |
| Psitive    | 1025       | 460          | 305          | 31                     |
| Psitive    | 940        | 395          | 240          | 26.5                   |
| Psitive    | 1030       | 465          | 295          | 31.5                   |
| Psitive    | 1140       | 580          | 340          | 39.5                   |
| Psitive    | 990        | 430          | 270          | 32.5                   |
| Psitive    | 1390       | 620          | 380          | 40.5                   |
| Psitive    | 1005       | 440          | 280          | 30.5                   |
| Psitive    | 820        | 260          | 185          | 21                     |
| Psitive    | 1000       | 445          | 275          | 28                     |
| Psitive    | 880        | 360          | 210          | 22.5                   |
| Psitive    | 1300       | 595          | 350          | 38                     |
| Psitive    | 970        | 425          | 263          | 24.5                   |
| Psitive    | 980        | 415          | 265          | 25                     |
| Psitive    | 400        | 200          | 150          | 44                     |
| Psitive    | 920        | 385          | 230          | 24                     |
| Psitive    | 1370       | 610          | 360          | 27.5                   |
| Psitive    | 1010       | 450          | 285          | 29                     |
| Psitive    | 510        | 220          | 110          | 36                     |
| Psitive    | 930        | 390          | 235          | 38.5                   |
| Psitive    | 995        | 435          | 272          | 28.5                   |
| Psitive    | 1130       | 570          | 335          | 37                     |
| Psitive    | 1550       | 640          | 450          | 42                     |
| Psitive    | 1035       | 480          | 310          | 32                     |
| Psitive    | 750        | 245          | 180          | 17                     |
| Psitive    | 1120       | 550          | 335          | 35.5                   |
| Psitive    | 890        | 370          | 215          | 10                     |
| Psitive    | 900        | 380          | 220          | 23                     |
| Psitive    | 910        | 375          | 225          | 23.5                   |
| Psitive    | 550        | 235          | 170          | 34                     |
| Psitive    | 800        | 285          | 190          | 19                     |
| Psitive    | 1020       | 470          | 300          | 50                     |
| Psitive    | 1040       | 490          | 315          | 33                     |
| Psitive    | 780        | 255          | 195          | 20                     |
| Psitive    | 840        | 330          | 200          | 14                     |
| Psitive    | 860        | 350          | 205          | 22                     |
| Psitive    | 1060       | 500          | 325          | 33.5                   |
| Psitive    | 570        | 240          | 175          | 18                     |
| Psitive    | 1045       | 510          | 330          | 16                     |
| Psitive    | 1350       | 600          | 355          | 39                     |
| Psitive    | 530        | 230          | 135          | 35                     |
| Psitive    | 985        | 420          | 260          | 25.5                   |
| Psitive    | 1080       | 530          | 320          | 34.5                   |
| Psitive    | 1410       | 660          | 420          | 30                     |

| PD-1+ CD8+ T Cells (%) | IL-2R | IL-1B | TNFa |
|------------------------|-------|-------|------|
| 29                     | 1050  | 180   | 106  |
| 51                     | 650   | 118   | 57   |
| 62                     | 520   | 75    | 30   |
| 34                     | 620   | 106   | 49   |
| 54                     | 760   | 141   | 78   |
| 30                     | 590   | 100   | 39   |
| 18                     | 720   | 148   | 80   |
| 40                     | 645   | 114   | 55.2 |
| 30                     | 580   | 97    | 38   |
| 38                     | 635   | 116   | 54   |
| 58                     | 710   | 133   | 69   |
| 42                     | 550   | 84    | 33   |
| 62                     | 870   | 163   | 94   |
| 37                     | 630   | 110   | 53   |
| 25                     | 490   | 73    | 28   |
| 33                     | 605   | 103   | 42   |
| 26                     | 380   | 46    | 23   |
| 54                     | 760   | 139   | 76   |
| 27                     | 570   | 82    | 37   |
| 29                     | 560   | 92    | 34   |
| 68                     | 600   | 101   | 40   |
| 28                     | 770   | 126   | 86   |
| 32                     | 850   | 156   | 90   |
| 35                     | 615   | 107   | 47   |
| 50                     | 320   | 20    | 12   |
| 55                     | 670   | 142   | 71   |
| 33                     | 610   | 103.5 | 45   |
| 52                     | 750   | 137   | 74   |
| 64                     | 900   | 172   | 98   |
| 41                     | 640   | 118   | 61   |
| 20                     | 400   | 59    | 24   |
| 49                     | 690   | 128   | 65   |
| 16                     | 530   | 88    | 35   |
| 27                     | 510   | 80    | 31   |
| 26                     | 500   | 78    | 32   |
| 44                     | 830   | 135   | 63   |
| 22                     | 480   | 72    | 26   |
| 80                     | 625   | 110   | 51   |
| 42                     | 660   | 124   | 55   |
| 23                     | 440   | 71    | 27   |
| 10                     | 250   | 56    | 21   |
| 24                     | 460   | 66    | 29   |
| 43                     | 680   | 127   | 63   |
| 21                     | 420   | 62    | 25   |
| 18                     | 655   | 120   | 59   |
| 56                     | 800   | 145   | 84   |
| 48                     | 360   | 28    | 18   |
| 28                     | 540   | 86    | 36   |
| 47                     | 700   | 130   | 67   |
| 36                     | 950   | 193   | 120  |



Patients with severe symptoms

| Participant | Age | Male/Female | BMI   | SBP | DBP |
|-------------|-----|-------------|-------|-----|-----|
| 1           | 64  | M           | 25.81 | 105 | 63  |
| 2           | 55  | M           | 27.78 | 120 | 73  |
| 3           | 81  | M           | 27.67 | 120 | 69  |
| 4           | 45  | F           | 31.59 | 140 | 81  |
| 5           | 37  | F           | 36.21 | 162 | 110 |
| 6           | 35  | M           | 30.15 | 130 | 76  |
| 7           | 37  | M           | 28.58 | 120 | 70  |
| 8           | 49  | F           | 23.85 | 106 | 63  |
| 9           | 49  | M           | 28.03 | 116 | 65  |
| 10          | 50  | F           | 26.14 | 119 | 66  |
| 11          | 62  | M           | 27    | 120 | 71  |
| 12          | 73  | M           | 23.74 | 112 | 64  |
| 13          | 43  | F           | 22.19 | 98  | 62  |
| 14          | 66  | F           | 24.68 | 113 | 63  |
| 15          | 51  | M           | 29.6  | 120 | 72  |
| 16          | 45  | F           | 21.49 | 95  | 61  |
| 17          | 51  | M           | 23.49 | 103 | 66  |
| 18          | 60  | F           | 31.89 | 150 | 86  |
| 19          | 72  | M           | 26.49 | 118 | 66  |
| 20          | 53  | F           | 27.96 | 120 | 73  |
| 21          | 40  | M           | 29.51 | 125 | 75  |
| 22          | 41  | M           | 33.07 | 160 | 102 |
| 23          | 42  | M           | 23.8  | 101 | 60  |
| 24          | 36  | M           | 37.03 | 139 | 81  |
| 25          | 50  | F           | 30.53 | 135 | 77  |
| 26          | 52  | F           | 34.37 | 138 | 80  |
| 27          | 69  | M           | 26.04 | 118 | 73  |
| 28          | 50  | F           | 21.37 | 96  | 61  |
| 29          | 47  | F           | 27.89 | 118 | 73  |
| 30          | 66  | M           | 27.51 | 119 | 73  |
| 31          | 30  | M           | 34.24 | 137 | 79  |
| 32          | 32  | M           | 35.09 | 155 | 95  |
| 33          | 46  | F           | 33.74 | 158 | 98  |
| 34          | 77  | F           | 25.1  | 117 | 67  |
| 35          | 64  | F           | 22    | 105 | 63  |
| 36          | 61  | M           | 22.89 | 95  | 60  |
| 37          | 52  | F           | 29.84 | 126 | 75  |
| 38          | 39  | M           | 32.85 | 144 | 84  |
| 39          | 50  | M           | 32.33 | 148 | 84  |
| 40          | 35  | F           | 33.05 | 141 | 81  |
| 41          | 52  | M           | 28.3  | 120 | 73  |
| 42          | 59  | M           | 29.71 | 122 | 73  |
| 43          | 71  | F           | 21.23 | 110 | 63  |
| 44          | 62  | M           | 28.41 | 120 | 68  |
| 45          | 67  | M           | 28.81 | 122 | 73  |
| 46          | 38  | F           | 19.69 | 90  | 59  |
| 47          | 51  | M           | 20.83 | 104 | 63  |
| 48          | 43  | M           | 34.23 | 160 | 104 |
| 49          | 61  | F           | 31    | 130 | 75  |
| 50          | 49  | F           | 20.31 | 90  | 59  |

| FBS | TG  | Cholesterol | HDL  | LDL | Albumin | Creatinine | GFR  |
|-----|-----|-------------|------|-----|---------|------------|------|
| 130 | 156 | 175         | 42   | 133 | 3.72    | 2.52       | 123  |
| 239 | 166 | 194         | 39   | 137 | 3.35    | 1.82       | 71   |
| 131 | 168 | 193         | 43.5 | 145 | 3.18    | 1.23       | 61   |
| 110 | 227 | 241         | 35   | 152 | 2.88    | 0.48       | 41   |
| 111 | 291 | 248         | 33   | 150 | 3.31    | 1.77       | 70   |
| 108 | 206 | 235         | 40   | 188 | 3.24    | 1.39       | 66   |
| 210 | 185 | 204         | 40   | 143 | 3.74    | 2.52       | 101  |
| 98  | 138 | 149         | 49.5 | 140 | 3.69    | 2.68       | 112  |
| 148 | 182 | 203         | 41.5 | 153 | 2.8     | 0.36       | 23   |
| 98  | 165 | 192         | 46.5 | 140 | 3       | 0.85       | 53   |
| 240 | 163 | 190         | 33   | 108 | 3.25    | 1.47       | 67   |
| 92  | 143 | 171         | 47   | 129 | 3.3     | 1.72       | 73   |
| 96  | 135 | 152         | 54   | 102 | 2.73    | 0.15       | 34   |
| 168 | 153 | 177         | 49   | 131 | 3       | 0.93       | 54.5 |
| 106 | 186 | 202         | 34   | 140 | 3.17    | 1.17       | 60   |
| 80  | 128 | 145         | 48.5 | 96  | 3.25    | 1.58       | 67   |
| 93  | 146 | 169         | 52   | 138 | 3.7     | 2.41       | 98   |
| 126 | 223 | 208         | 37   | 170 | 3.28    | 1.69       | 72.5 |
| 107 | 164 | 187         | 25   | 115 | 2.96    | 0.5        | 44   |
| 225 | 173 | 195         | 42   | 149 | 2.92    | 0.62       | 42   |
| 141 | 189 | 201         | 43   | 152 | 3.66    | 2.36       | 93.5 |
| 124 | 233 | 227         | 36   | 155 | 3.26    | 1.66       | 69   |
| 88  | 148 | 167         | 51.5 | 135 | 3.06    | 0.95       | 57   |
| 118 | 339 | 288         | 35   | 154 | 3.01    | 1.03       | 55   |
| 250 | 213 | 223         | 42.5 | 182 | 3.04    | 1.08       | 57   |
| 143 | 323 | 271         | 39   | 175 | 3.26    | 1.62       | 68.5 |
| 207 | 163 | 183         | 42   | 139 | 3.53    | 2.29       | 88   |
| 85  | 130 | 157         | 50.5 | 125 | 3.38    | 1.86       | 71.5 |
| 141 | 170 | 196         | 42   | 145 | 3.46    | 1.92       | 71.5 |
| 104 | 174 | 197         | 43.5 | 148 | 3.48    | 2.18       | 84   |
| 230 | 301 | 255         | 38.5 | 158 | 3.25    | 1.59       | 68   |
| 122 | 308 | 268         | 49   | 200 | 2.9     | 0.7        | 48.5 |
| 163 | 273 | 220         | 36.5 | 161 | 3.13    | 1.08       | 59   |
| 132 | 159 | 180         | 55   | 142 | 3.64    | 2.11       | 80.5 |
| 84  | 133 | 183         | 50   | 99  | 3.2     | 1.25       | 61   |
| 100 | 135 | 162         | 56.5 | 142 | 2.94    | 0.66       | 46   |
| 175 | 191 | 205         | 42   | 146 | 3.16    | 1.13       | 59.5 |
| 190 | 253 | 217         | 28   | 122 | 3.02    | 0.99       | 56   |
| 154 | 209 | 215         | 39   | 166 | 2.98    | 0.79       | 49   |
| 232 | 203 | 212         | 53   | 235 | 3.75    | 2.76       | 101  |
| 145 | 184 | 200         | 43   | 145 | 3.22    | 1.25       | 62   |
| 135 | 183 | 199         | 41   | 146 | 2.91    | 0.55       | 43   |
| 81  | 131 | 165         | 48   | 130 | 3.62    | 2.06       | 77   |
| 138 | 177 | 198         | 42   | 141 | 3.23    | 1.3        | 63   |
| 219 | 180 | 198         | 43   | 144 | 2.99    | 0.82       | 51   |
| 67  | 85  | 122         | 28   | 85  | 2.85    | 0.41       | 40   |
| 75  | 122 | 140         | 45.5 | 120 | 3.24    | 1.36       | 65   |
| 136 | 200 | 210         | 37   | 164 | 3.8     | 2.94       | 146  |
| 134 | 196 | 207         | 51   | 215 | 3.55    | 1.95       | 74   |
| 114 | 124 | 132         | 42   | 114 | 3.58    | 2          | 76   |

| Diabet   | COVID Test | Lymphocyte | CD4+ T Cells | CD8+ T Cells |
|----------|------------|------------|--------------|--------------|
| Negative | Psitive    | 920        | 375          | 210          |
| Psitive  | Psitive    | 840        | 345          | 175          |
| Negative | Psitive    | 1500       | 550          | 320          |
| Negative | Psitive    | 950        | 390          | 240          |
| Negative | Psitive    | 470        | 225          | 78           |
| Negative | Psitive    | 640        | 255          | 100          |
| Psitive  | Psitive    | 850        | 348          | 180          |
| Negative | Psitive    | 660        | 260          | 105          |
| Negative | Psitive    | 670        | 265          | 110          |
| Negative | Psitive    | 150        | 80           | 25           |
| Psitive  | Psitive    | 740        | 305          | 140          |
| Negative | Psitive    | 450        | 220          | 75           |
| Negative | Psitive    | 880        | 360          | 192          |
| Psitive  | Psitive    | 750        | 310          | 145          |
| Negative | Psitive    | 570        | 245          | 90           |
| Negative | Psitive    | 910        | 370          | 205          |
| Negative | Psitive    | 720        | 295          | 130          |
| Negative | Psitive    | 890        | 365          | 195          |
| Negative | Psitive    | 690        | 275          | 115          |
| Psitive  | Psitive    | 230        | 130          | 40           |
| Negative | Psitive    | 870        | 357          | 190          |
| Negative | Psitive    | 900        | 368          | 200          |
| Negative | Psitive    | 410        | 205          | 65           |
| Negative | Psitive    | 1200       | 450          | 290          |
| Psitive  | Psitive    | 860        | 350          | 185          |
| Negative | Psitive    | 1030       | 400          | 270          |
| Psitive  | Psitive    | 250        | 160          | 45           |
| Negative | Psitive    | 530        | 240          | 85           |
| Negative | Psitive    | 730        | 300          | 135          |
| Negative | Psitive    | 780        | 315          | 150          |
| Psitive  | Psitive    | 430        | 210          | 70           |
| Negative | Psitive    | 970        | 385          | 230          |
| Psitive  | Psitive    | 390        | 200          | 60           |
| Negative | Psitive    | 610        | 250          | 95           |
| Negative | Psitive    | 790        | 320          | 155          |
| Negative | Psitive    | 710        | 290          | 125          |
| Psitive  | Psitive    | 510        | 235          | 83           |
| Psitive  | Psitive    | 820        | 335          | 168          |
| Psitive  | Psitive    | 830        | 340          | 170          |
| Psitive  | Psitive    | 1050       | 420          | 380          |
| Negative | Psitive    | 800        | 325          | 160          |
| Negative | Psitive    | 810        | 330          | 165          |
| Negative | Psitive    | 490        | 230          | 80           |
| Negative | Psitive    | 1000       | 395          | 250          |
| Psitive  | Psitive    | 680        | 270          | 112          |
| Negative | Psitive    | 370        | 190          | 55           |
| Negative | Psitive    | 930        | 380          | 215          |
| Negative | Psitive    | 350        | 180          | 50           |
| Negative | Psitive    | 940        | 382          | 220          |
| Negative | Psitive    | 700        | 280          | 120          |

| PD-1+ CD4+ T Cells (%) | PD-1+ CD8+ T Cells (%) | IL-2R | IL-1B | TNFa |
|------------------------|------------------------|-------|-------|------|
| 27                     | 44                     | 1130  | 206   | 108  |
| 38.5                   | 63                     | 1010  | 184   | 90   |
| 34                     | 57                     | 1250  | 218   | 132  |
| 44                     | 74                     | 1450  | 260   | 160  |
| 46                     | 78                     | 720   | 81    | 44   |
| 45.5                   | 76                     | 900   | 150   | 69   |
| 39                     | 64                     | 1020  | 188   | 92   |
| 30.5                   | 53                     | 840   | 135   | 62   |
| 31                     | 54                     | 850   | 140   | 63   |
| 44.5                   | 75                     | 580   | 60    | 32   |
| 34.5                   | 58                     | 940   | 161   | 76   |
| 26.5                   | 42                     | 710   | 77    | 42   |
| 41                     | 68                     | 1200  | 213   | 102  |
| 35                     | 58                     | 950   | 165   | 78   |
| 29                     | 50                     | 760   | 100   | 52   |
| 22                     | 28                     | 830   | 130   | 61   |
| 33.5                   | 57                     | 880   | 147   | 66   |
| 36.5                   | 60                     | 910   | 155   | 70   |
| 32                     | 55                     | 820   | 124   | 60   |
| 43.5                   | 73                     | 530   | 55    | 30   |
| 32.5                   | 56                     | 980   | 175   | 84   |
| 37                     | 60                     | 1040  | 192   | 94   |
| 25                     | 38                     | 450   | 50    | 25   |
| 31.5                   | 55                     | 1100  | 201   | 122  |
| 42                     | 70                     | 1300  | 231   | 145  |
| 40.5                   | 67                     | 990   | 178   | 86   |
| 41.5                   | 69                     | 680   | 70    | 38   |
| 28.5                   | 49                     | 750   | 96    | 50   |
| 26                     | 40                     | 770   | 104   | 54   |
| 28                     | 48                     | 800   | 118   | 58   |
| 42.5                   | 71                     | 700   | 74    | 40   |
| 35.5                   | 59                     | 890   | 150   | 68   |
| 51                     | 85                     | 810   | 120   | 59   |
| 29.5                   | 51                     | 790   | 112   | 57   |
| 36                     | 59                     | 960   | 168   | 80   |
| 33                     | 56                     | 860   | 140   | 64   |
| 39.5                   | 65                     | 870   | 143   | 65   |
| 37.5                   | 61                     | 970   | 170   | 82   |
| 38                     | 62                     | 1000  | 180   | 88   |
| 43                     | 72                     | 1170  | 210   | 114  |
| 15                     | 16                     | 660   | 66    | 36   |
| 20                     | 28                     | 730   | 85    | 46   |
| 27.5                   | 46                     | 740   | 90    | 48   |
| 24                     | 35                     | 930   | 160   | 74   |
| 55                     | 92                     | 920   | 158   | 72   |
| 23                     | 32                     | 300   | 35    | 18   |
| 30                     | 52                     | 1060  | 196   | 96   |
| 48                     | 80                     | 780   | 107   | 56   |
| 40                     | 66                     | 1080  | 198   | 98   |
| 19                     | 24                     | 620   | 63    | 34   |
